# Supplementary figures and images for: Niche Shifts, Hybridization, Polyploidy and Geographic Parthenogenesis in Western North American Hawthorns (Crataegus subg. Sanguineae, Rosaceae)
Source: MDPI journal article supplement (doi:10.3390/agronomy11112133), 2021-10-25

**A**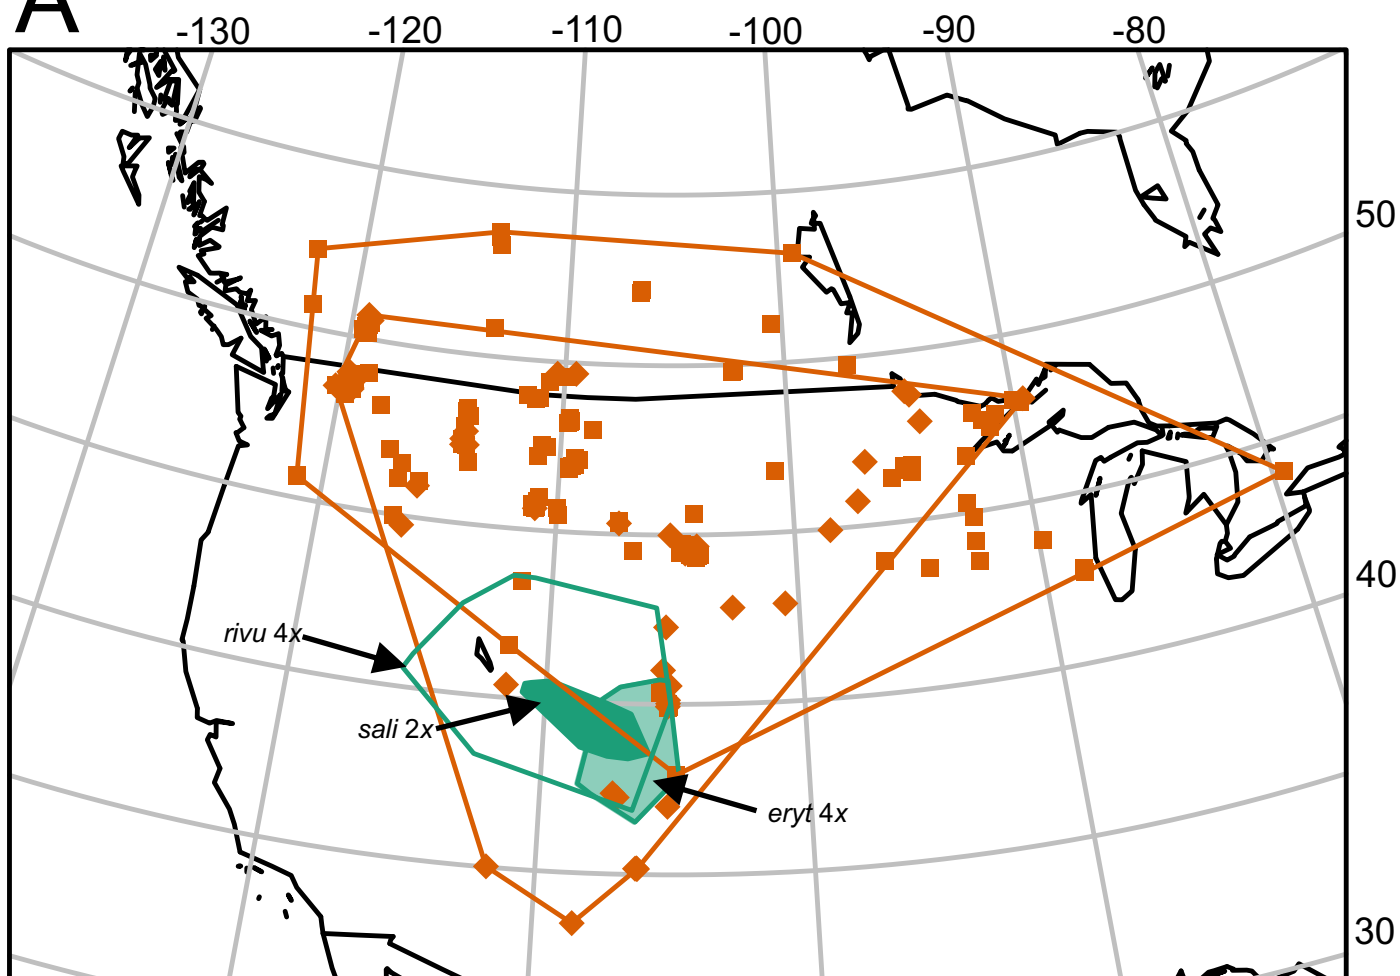**B**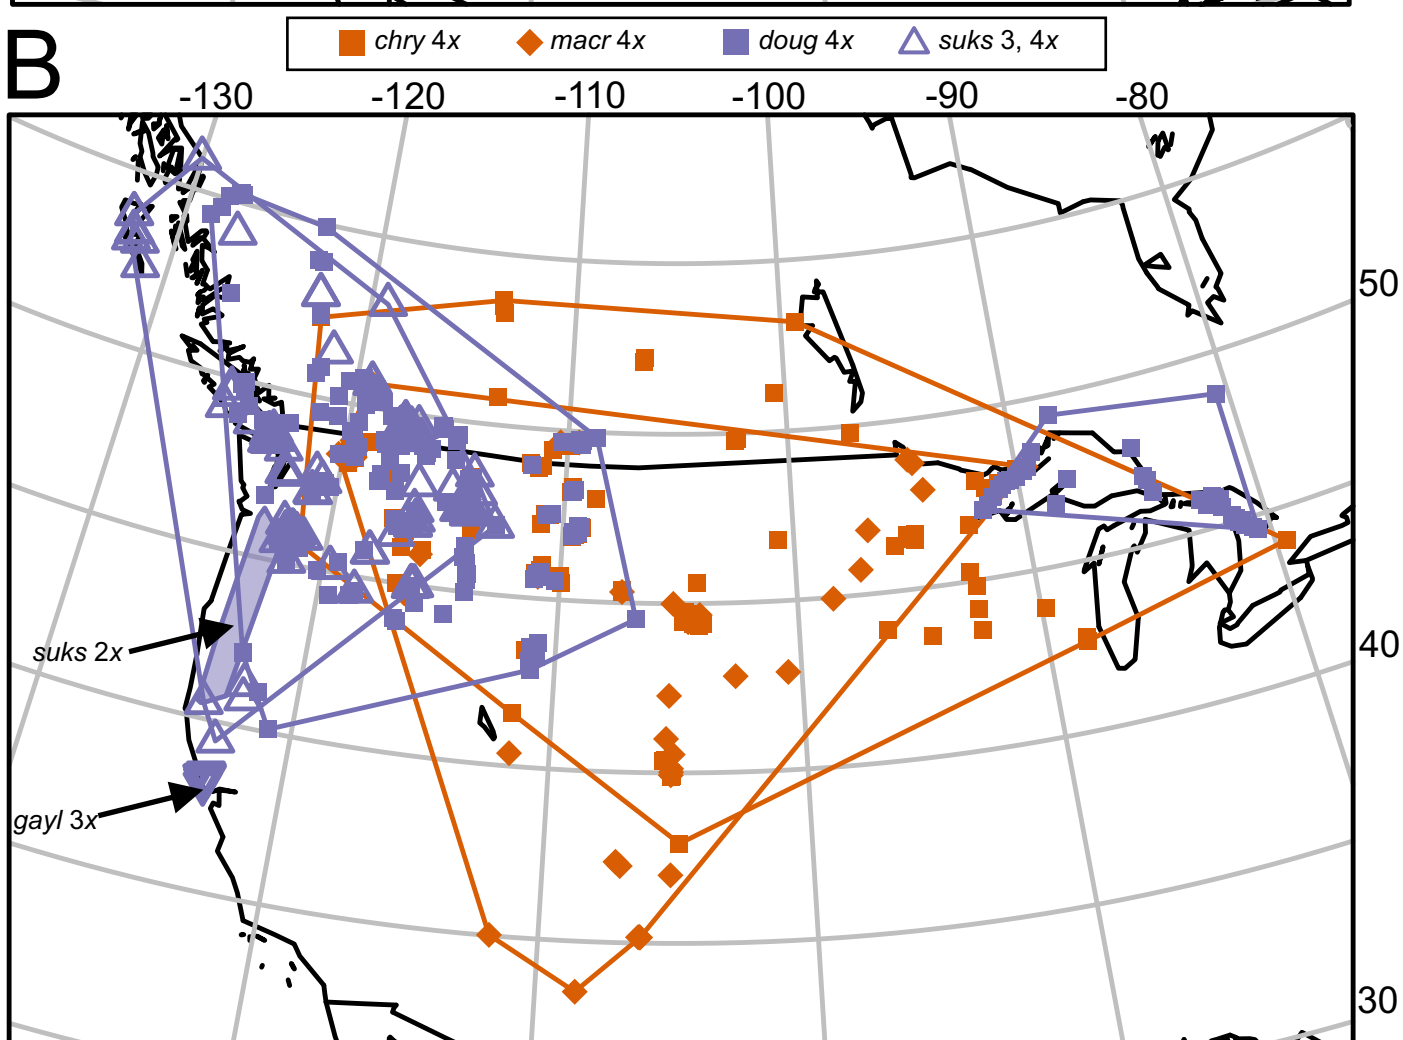

Supplement: s1 [file s1]

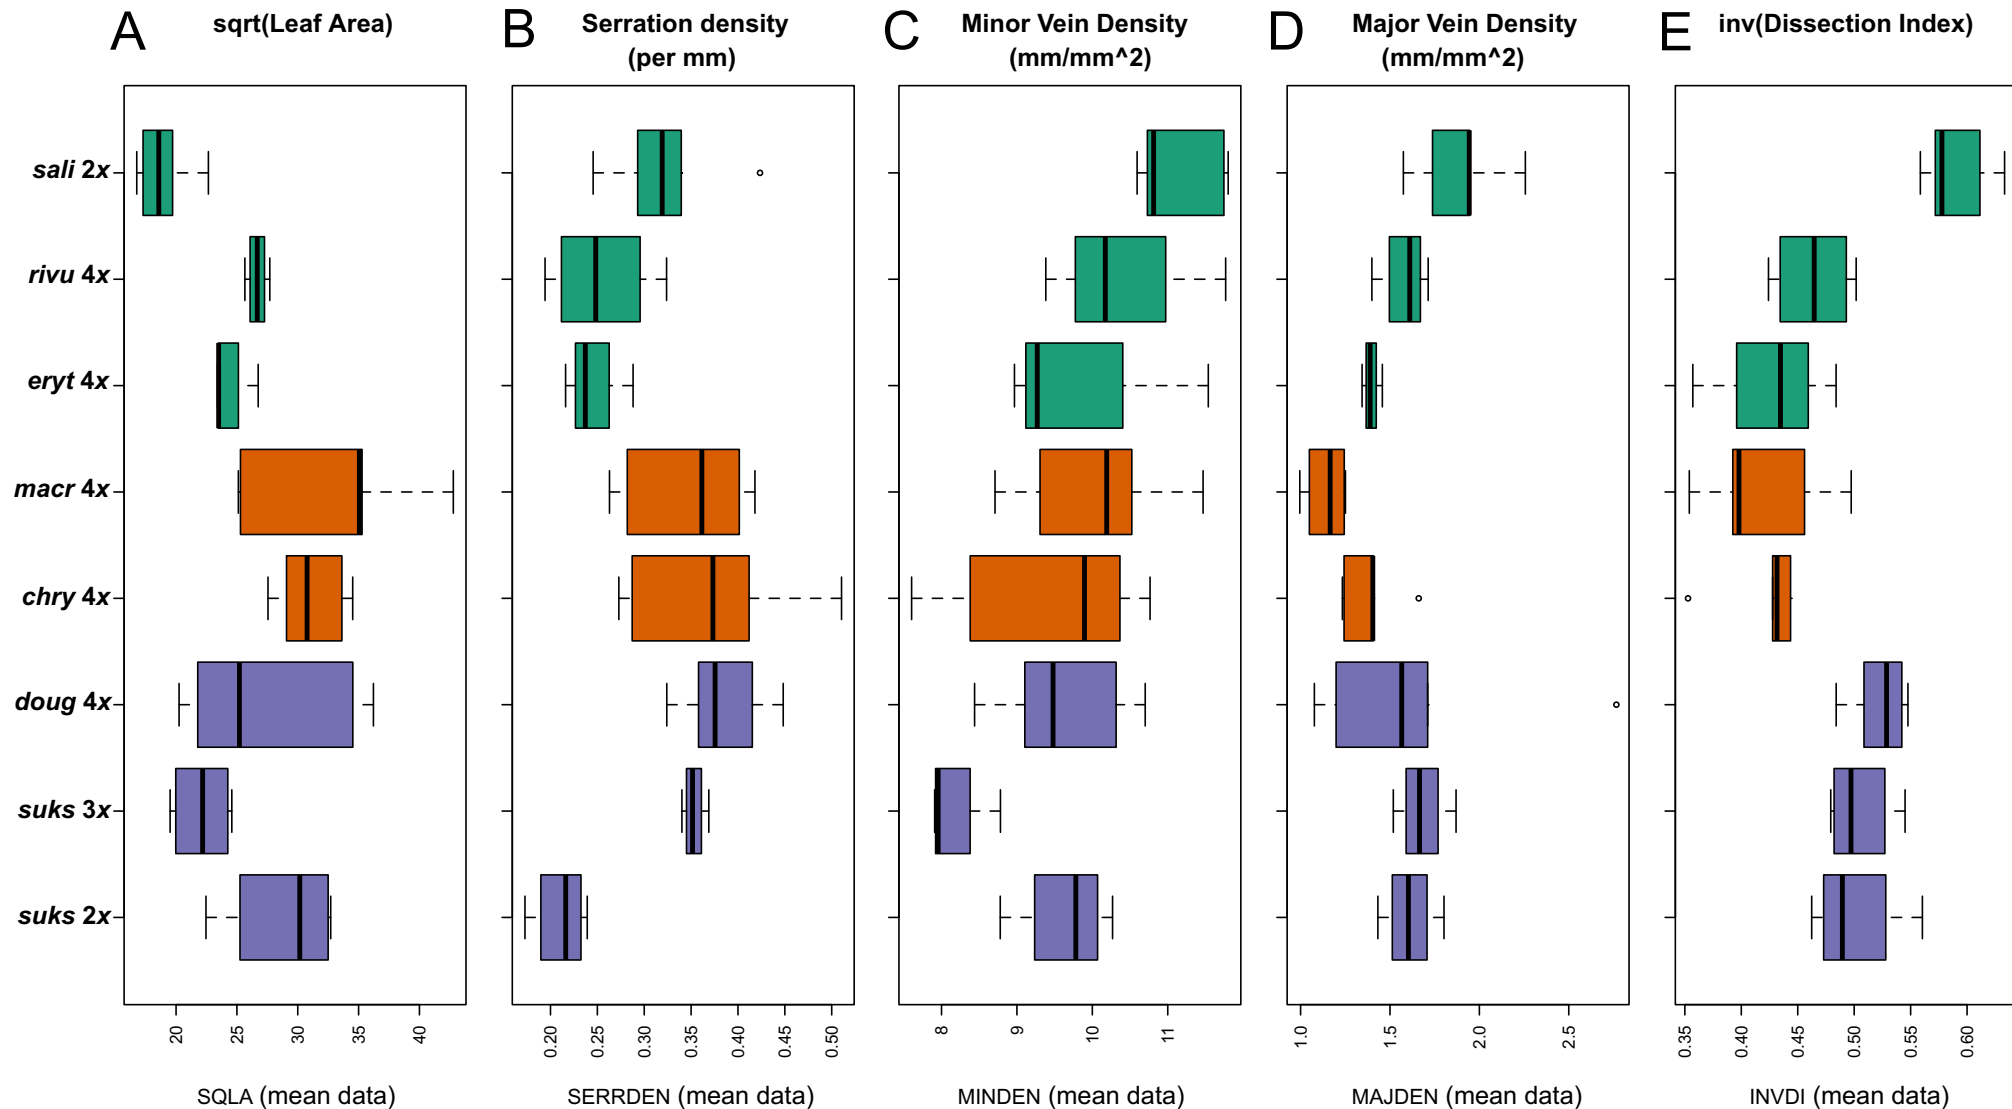

Supplement: s1 [file s1]

**A**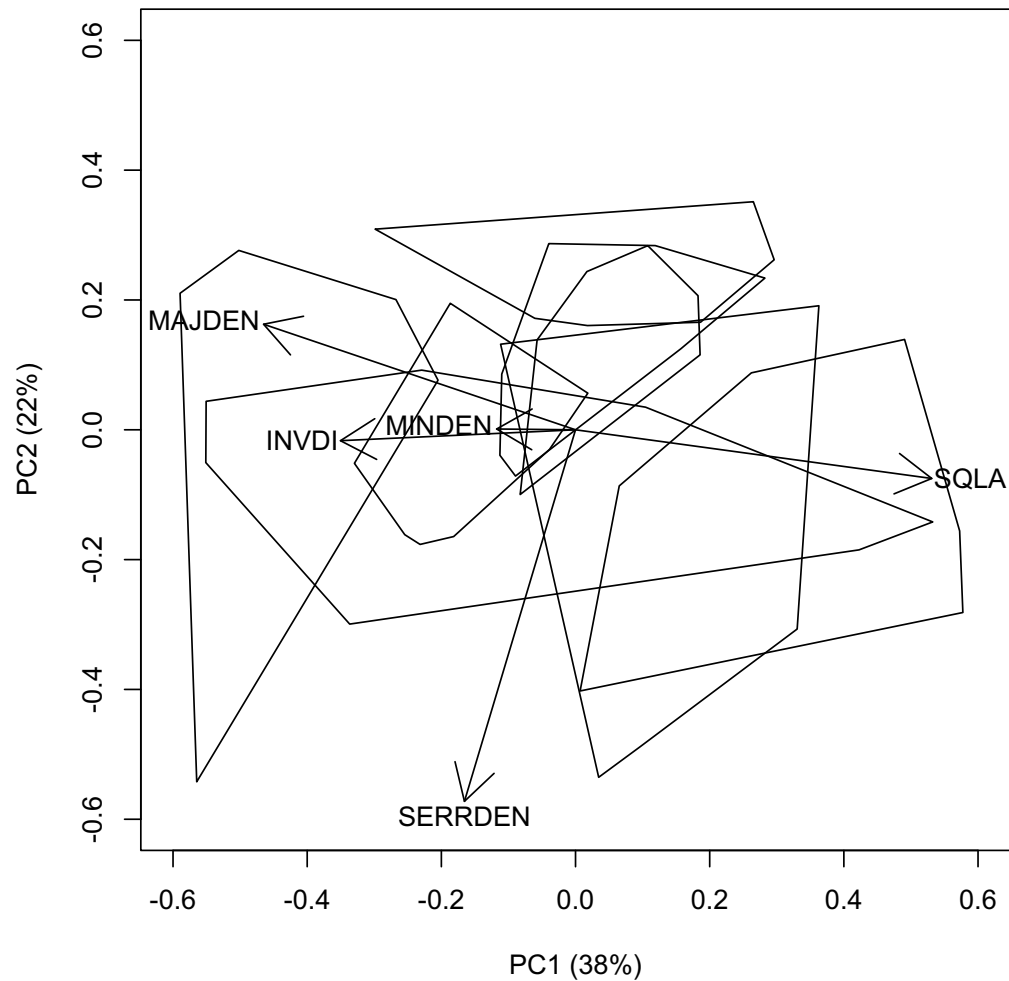**B**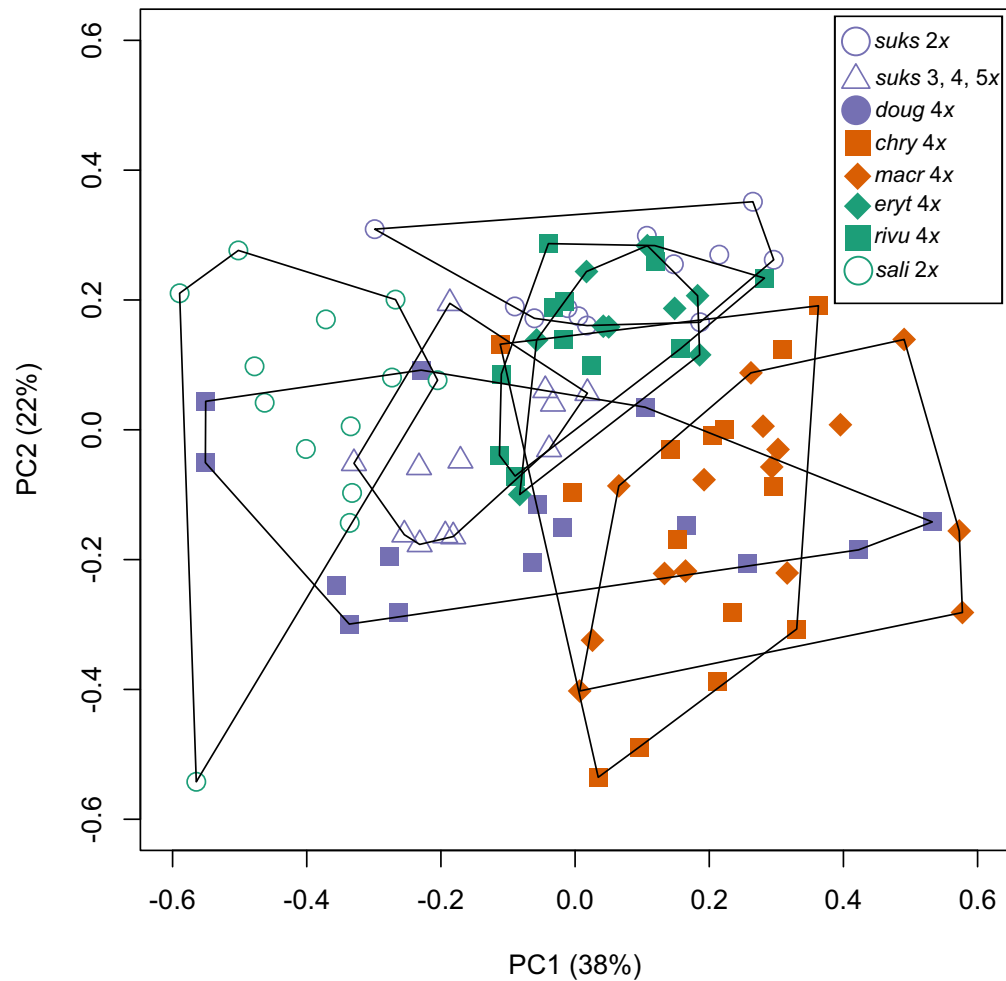

Supplement: s1 [file s1]

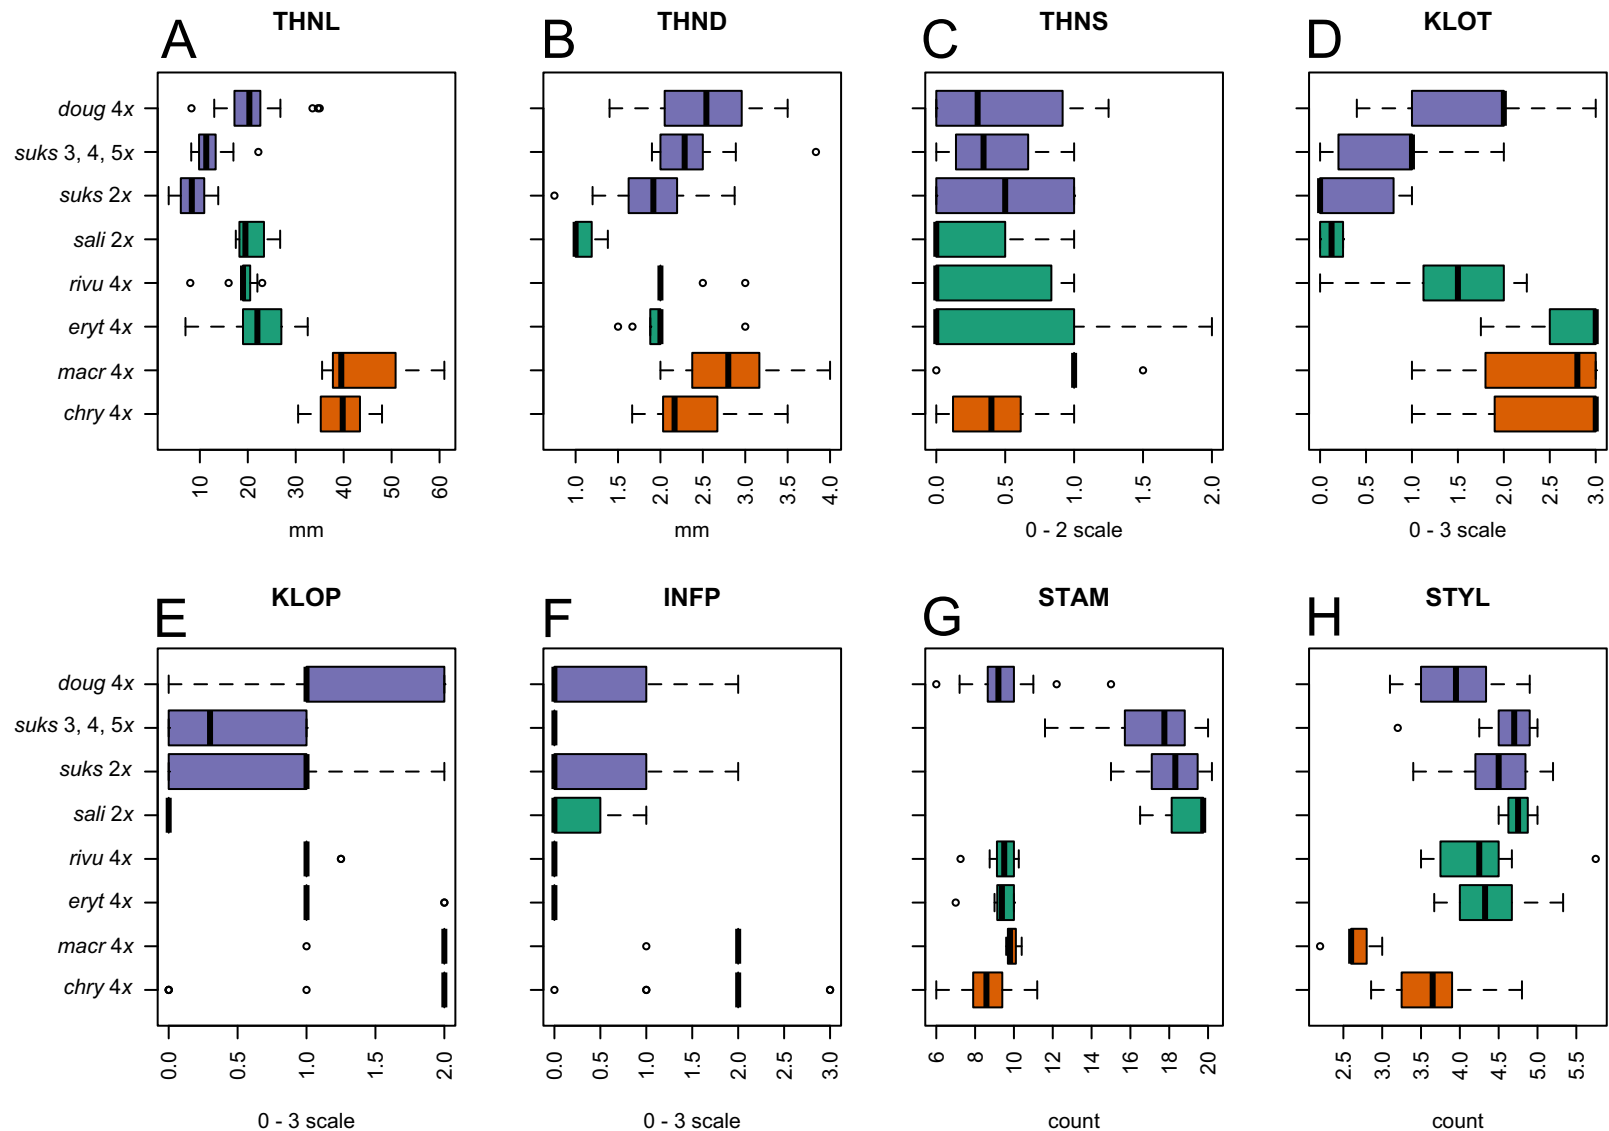

Supplement: s1 [file s1]

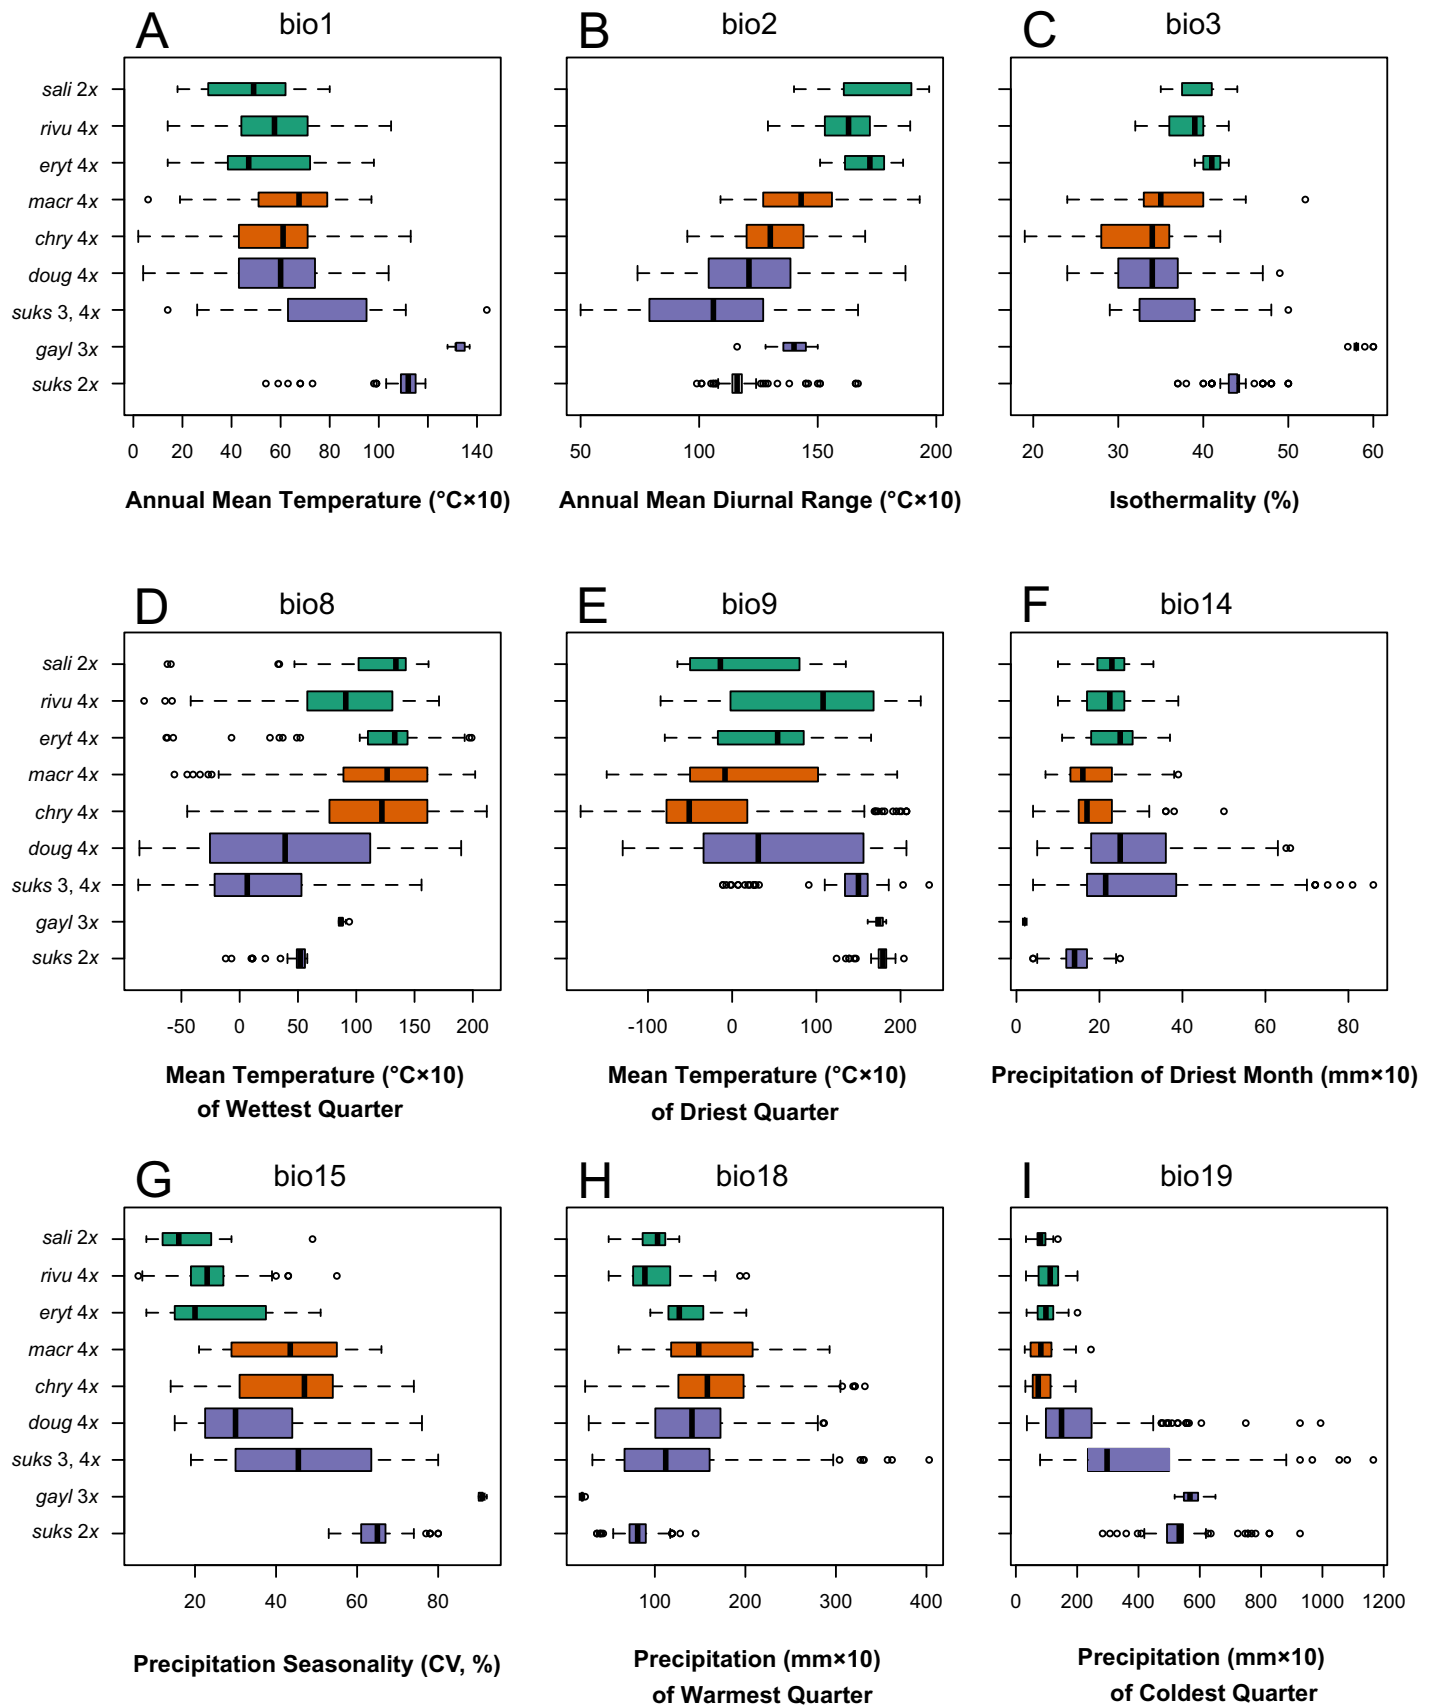

Supplement: s1 [file s1]

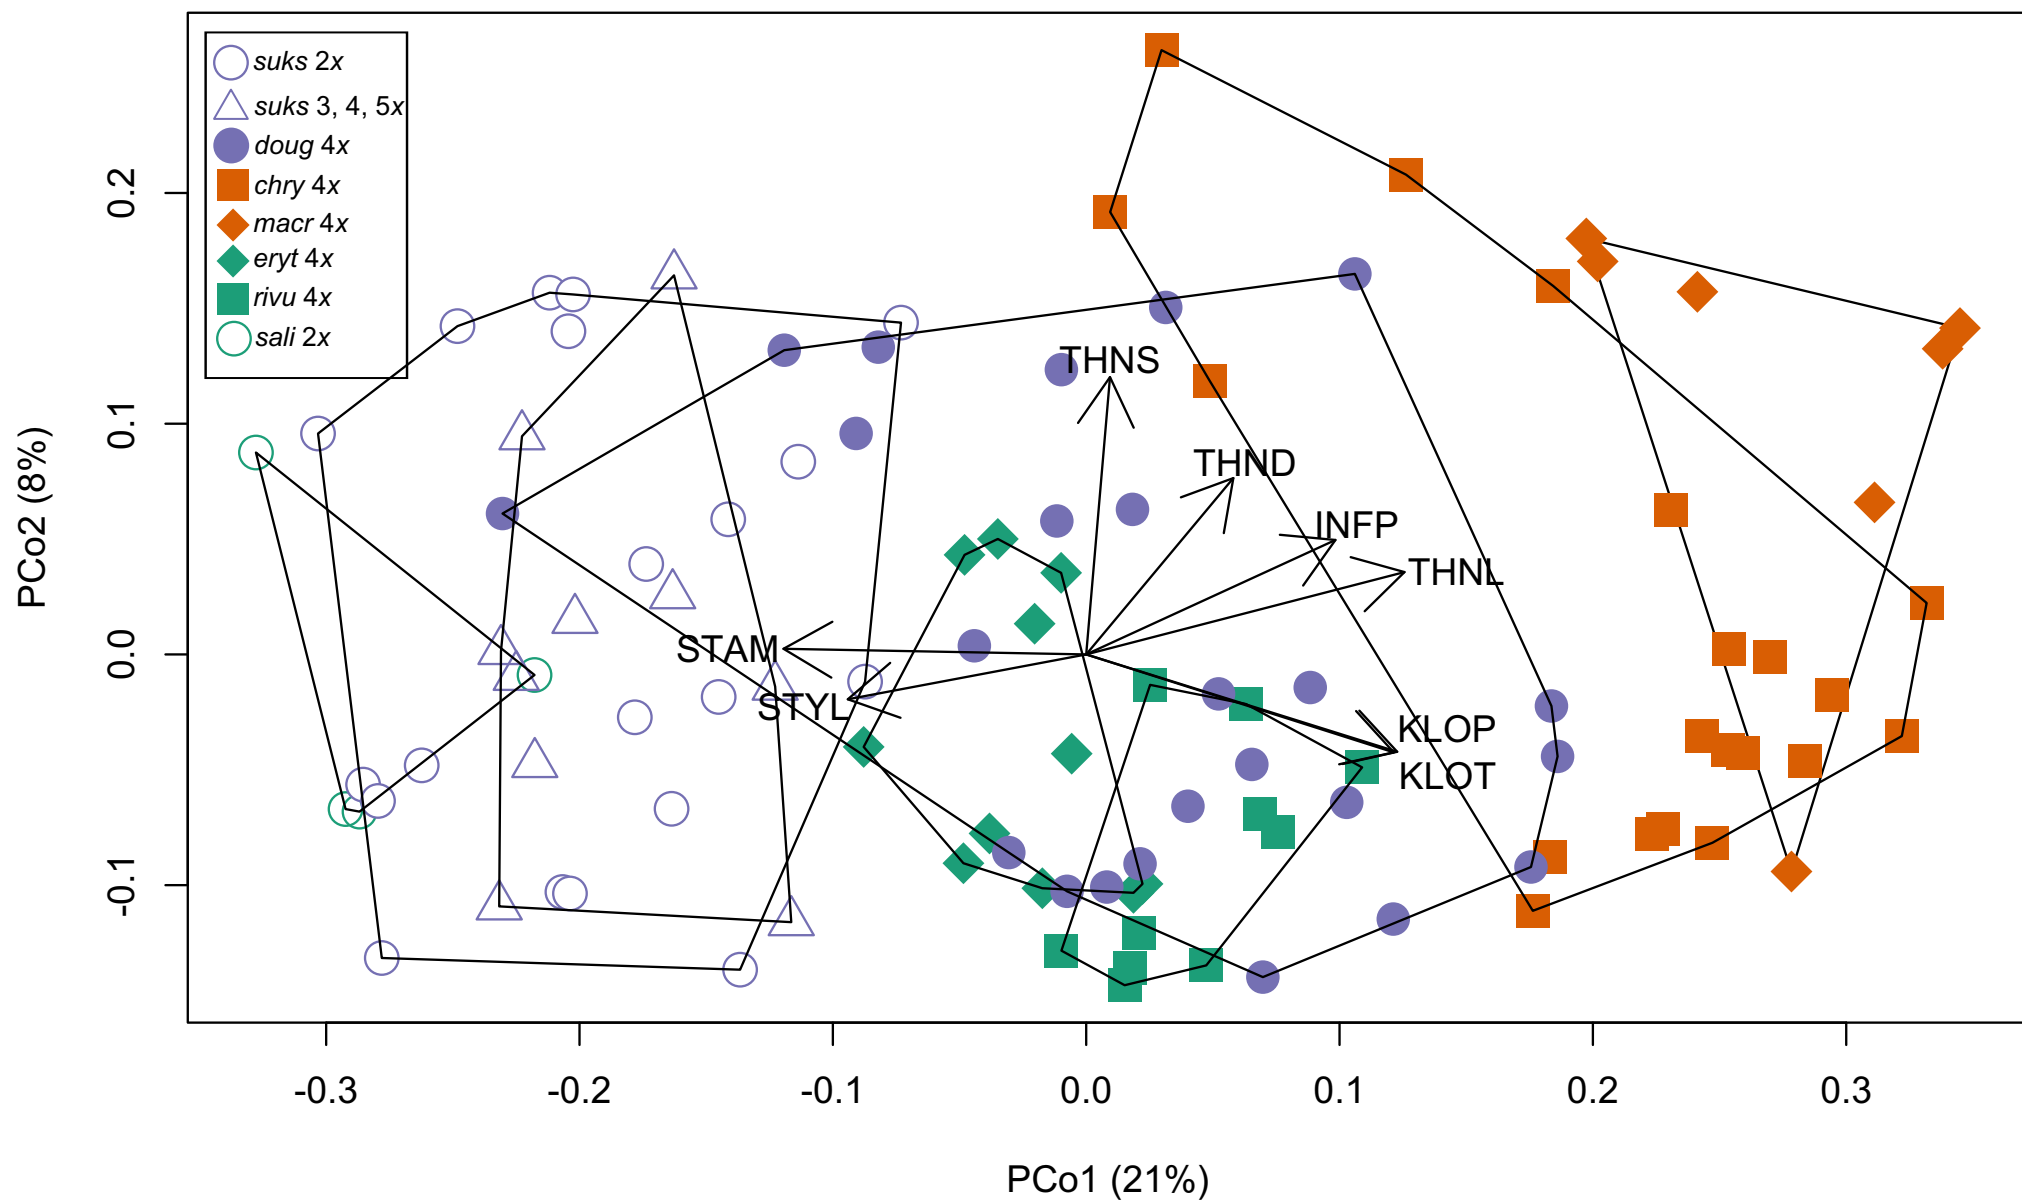

Supplement: s1 [file s1]

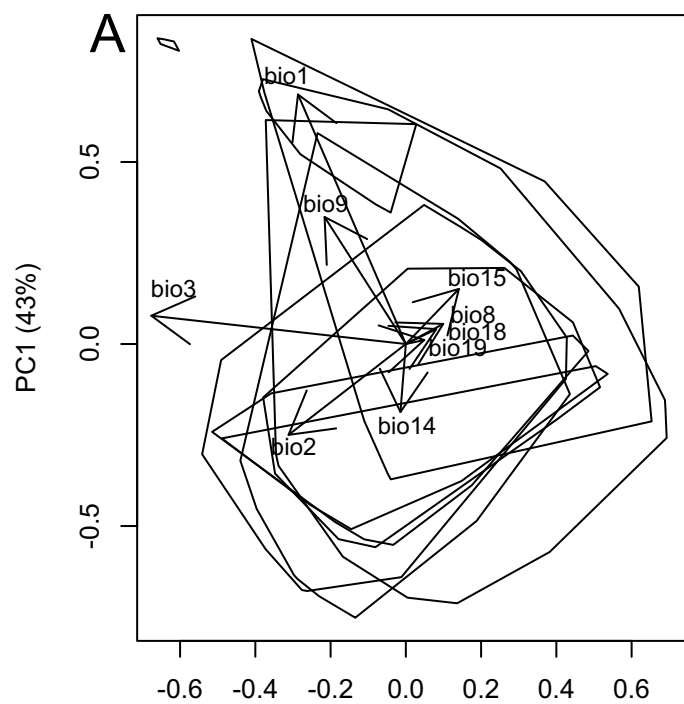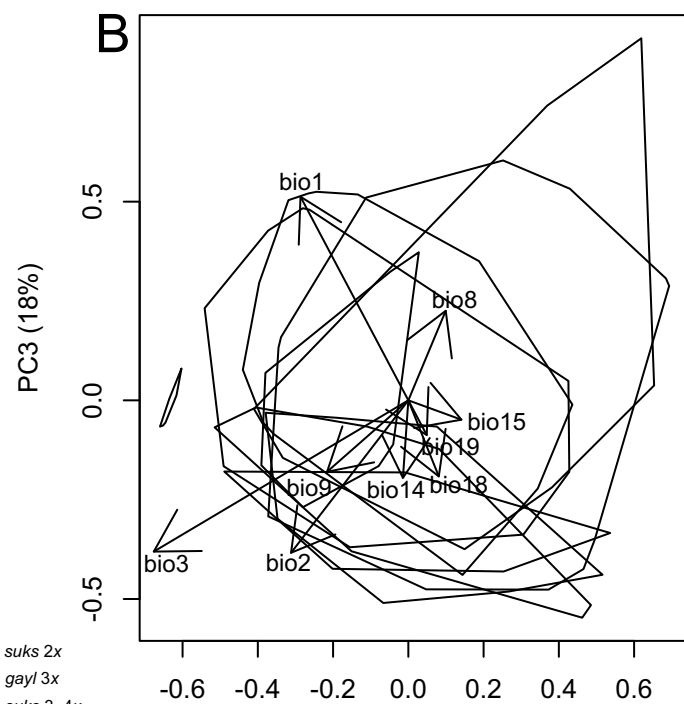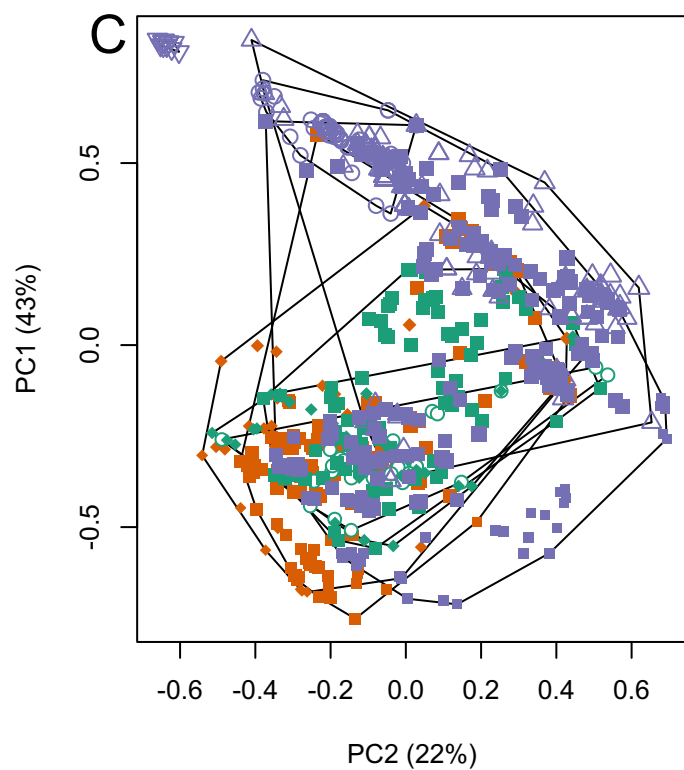

○ suks 2x  
 ▼ gayl 3x  
 △ suks 3, 4x  
 ■ doug 4x  
 ■ chry 4x  
 ◆ macr 4x  
 ◆ eryt 4x  
 ■ rivu 4x  
 ○ sali 2x

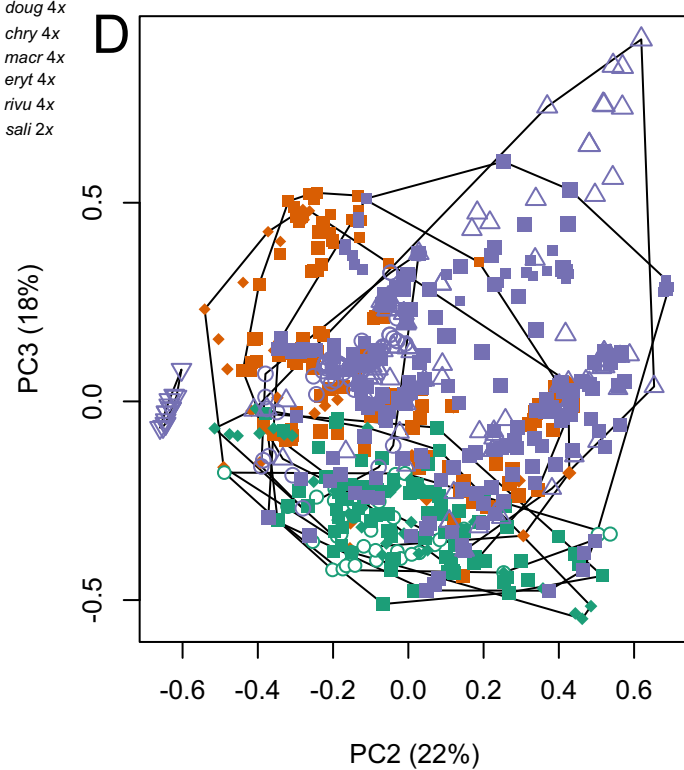

Supplement: s1 [file s1]
